# Supplementary material
Source: publisher figshare collection journal article supplement (https://acs.figshare.com/ndownloader/files/4174474)
Supplement: Supplementary file 1 [file 4174474]

**Supporting Material for**  
**Reactive Molecular Dynamics Simulation of Solid Nitromethane Impact on (010)**  
**Surfaces Induced and Non-impact Thermo Decomposition**

Feng Guo, Xin-lu Cheng, Hong Zhang

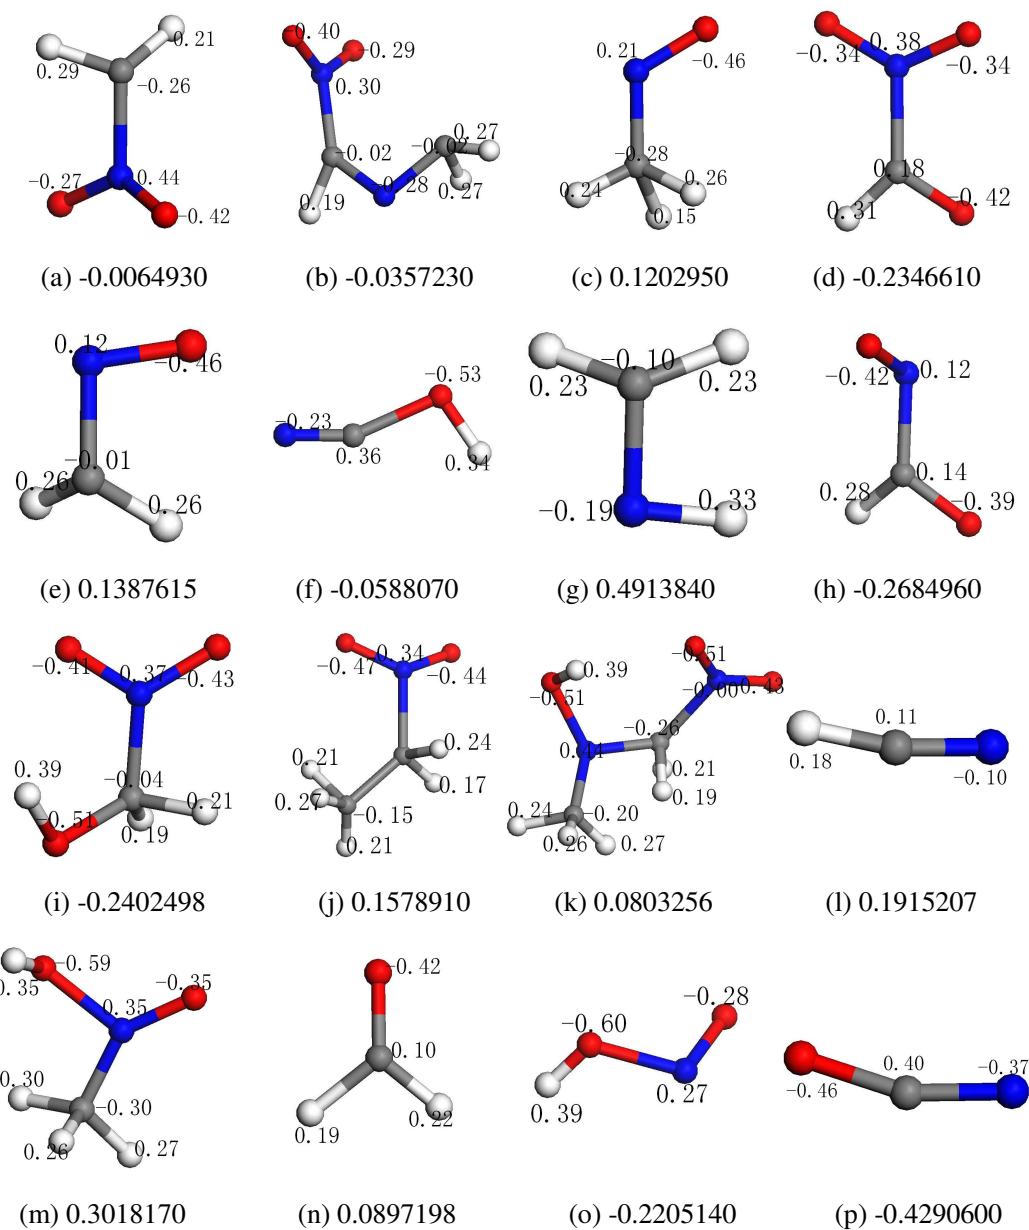

Figure 1. A part of intermediates observed in early time in simulations, the C atoms are indicated in gray, the H in white, O in red, and N in blue. Charges of every atom are labeled near the atoms, and total charge of every fragment is labeled under the intermediate.

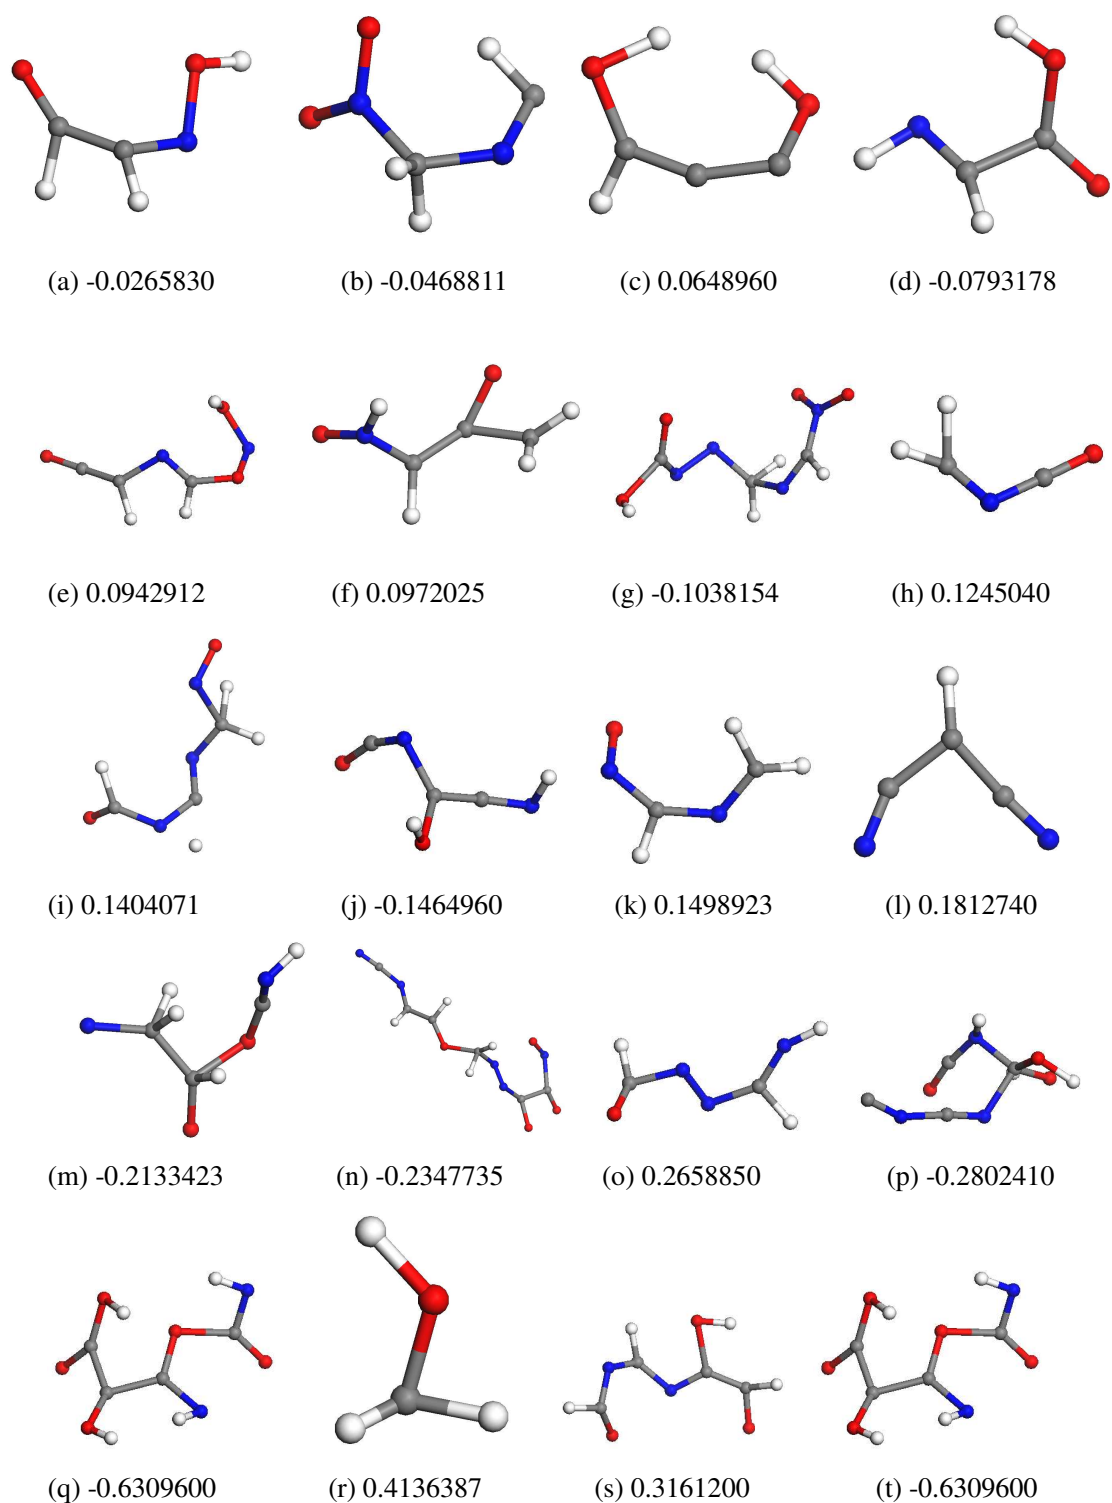

Figure 2. A part of C-N-O chain structures observed in simulation times about 20.0 ps. Total charges is labeled under each molecular fragment. As simulation increase, these fragments formed larger clusters step by step.
